# Supplementary material for: A Review of User Perceptions of Drought Indices and Indicators Used in the Diverse Climates of North America
Source: MDPI journal article supplement (doi:10.3390/atmos14121794), 2023-12-06
Supplement: s1 [file s1]

Archive with 1 entries (1 files):
- atmosphere-2755352-supplementary.pdf
